# Supplementary material
Source: ML conference proceedings conference paper supplement (https://openreview.net/forum?id=kOxP7Fbeduy)
Supplement: supplementary_material [file attachment]

---

# Supplementary Material for - SeasonDepth: Cross-Season Monocular Depth Prediction Dataset and Benchmark under Multiple Environments

---

Hanjiang Hu<sup>1,2</sup> Baoquan Yang<sup>1</sup> Zhijian Qiao<sup>1</sup> Ding Zhao<sup>2</sup> Hesheng Wang<sup>1\*</sup>

<sup>1</sup>Shanghai Jiao Tong University <sup>2</sup>Carnegie Mellon University

{hanjianghu,dingzhao}@cmu.edu {yangbaoquan,qiaozhijian,wanghesheng}@sjtu.edu.cn

## 1 Building SeasonDepth Dataset

In this section, we present more details about the process of building *SeasonDepth* dataset and statistical analysis of depth maps in each environment.

### 1.1 Details in Building Dataset

We adopt the categorized slices of Urban part according to [1] as original images after rectification though camera intrinsic file. Specifically, we use `slice2`, `slice3`, `slice7`, `slice8` as the split test slices for evaluation and benchmark, and the other slices `slice4`, `slice5`, `slice6` are intended to treat as training set. Note that since not all images from original dataset are appropriate for depth prediction due to huge noise, *e.g.*, a moving truck covering almost all the pixels, we remove such images in the final version. The released dataset split can be found on <https://seasondepth.github.io/>. The numbers of images under all the environments for all slices in training set and test set are shown in Tab. 1. The abbreviations of environments are S for Sunny, C for Cloudy, O for Overcast, LS for Low Sun, Sn for Snow, F for Foliage, NF for No Foliage, and MF for Mixed Foliage. It could be seen that the total number of test set is a little bit larger than that of training set with more different slices, which helps to make the benchmark results more accurate and reliable. Also, the training set can be used for fine-tuning for pretrained models, which do not need too many images. Images from left and right cameras are merged together in the same slice for calculation.

We adopt COLMAP’s MVS pipeline [2, 3] to find the 3D structure and depth map. We follow the instruction on <https://colmap.github.io/> with sequential SIFT matching with RANSAC, sparse reconstruction and dense reconstruction. Some important detailed hyperparameters can be found in Tab. 2, while others are with default configuration. To make full use of the image sequences, we adjust the sequential matching overlap to be 15 instead of the whole sequence, improving the local optimization with less noise. During each iteration of RANSAC algorithm in triangulation, the minimum inlier ratio for SIFT matching is set to be 0.65 for the consideration that most pixels of a single image are static in most cases. The maximum SIFT matching distance is 0.55 to adapt the distance of dynamic objects and improve the efficiency. The image samples after SfM can be found in Fig. 1-(b)

The valid pixels of the original depth map are between lower threshold and upper threshold to filter most noise pixels. For one thing, since the fields, forests and cloud in the far distance away from the camera matter little to the depth prediction applications for the autonomous driving, we truncate the depth values over 92% (80% in some cases) of the whole image to focus more on the near roads, vehicles, buildings, vegetation, *etc.* For another, due to the camera placement on the both sides of the car, the very near descriptors of the road cannot be correctly matched during SfM and reconstructed

---

\*Corresponding author

Table 1: Numbers of Images under All the Environments for All Slices

| Environments                      | Training Set |        |        |            | Test Set |        |        |        |            |
|-----------------------------------|--------------|--------|--------|------------|----------|--------|--------|--------|------------|
|                                   | slice4       | slice5 | slice6 | All Slices | slice2   | slice3 | slice7 | slice8 | All Slices |
| S+NF<br>Apr. 4th                  | 446          | 197    | 544    | 1187       | 382      | 450    | 190    | 449    | 1471       |
| S+F<br>Sept. 1st                  | 496          | 243    | 496    | 1235       | 385      | 464    | 249    | 490    | 1588       |
| S+F<br>Sept. 15th                 | 404          | 222    | 526    | 1152       | 335      | 329    | 462    | 457    | 1583       |
| C+F<br>Oct. 1st                   | 406          | 216    | 628    | 1250       | 347      | 438    | 350    | 244    | 1379       |
| S+F<br>Oct. 19th                  | 382          | 201    | 558    | 1141       | 301      | 439    | 412    | 230    | 1382       |
| O+MF<br>Oct. 28th                 | 394          | 204    | 536    | 1134       | 333      | 418    | 362    | 442    | 1555       |
| LS+MF<br>Nov. 3rd                 | 448          | 212    | 518    | 1178       | 335      | 447    | 203    | 416    | 1401       |
| LS+MF<br>Nov. 12th                | 484          | 221    | 558    | 1263       | 352      | 500    | 357    | 501    | 1710       |
| C+MF<br>Nov. 22nd                 | 394          | 200    | 578    | 1172       | 298      | 436    | 380    | 423    | 1537       |
| LS+NF+S <sub>n</sub><br>Dec. 21st | 482          | 213    | 592    | 1287       | 284      | 512    | 56     | 147    | 999        |
| LS+F<br>Mar. 4th                  | 380          | 214    | 576    | 1170       | 354      | 222    | 0      | 512    | 1088       |
| O+F<br>Jul. 28th                  | 458          | 223    | 560    | 1241       | 256      | 425    | 384    | 467    | 1532       |
| All<br>Environments               | 5174         | 2566   | 6670   | 14410      | 3962     | 5080   | 3405   | 4778   | 17225      |

for dense depth map, which should be removed by filtering the pixel values less than 5% of the whole depth map. Besides, in the special cases that all the near-road noises appear on the bottom of the images, we directly filter the pixels with depth values greater than a threshold in that rectangular bottom area of the images. The samples after depth range truncation can be seen in Fig. 1-(c).

Although depth range truncation removes some pixels with too large depth values, there are still misreconstructed pixels of sky, cloud or shadow with normal depth values. We use PowerToys from <https://github.com/microsoft/PowerToys> to pick up typical HSV values for further refinement and denoising. As Tab. 3 shows, the minimal and maximal HSV values are given for some typical noises, including sky, cloud, reflections and shadows. For the clear or cloudy sky, Value tends to be high around 200 and Hue is usually blue or white. However, for those areas in the shadow of low sun, Saturation and Value are extremely low to be about 10% so that the depth map pixels are too hard to be correctly reconstructed, which need to be filtered. The samples after HSV refinement are shown in Fig. 1-(d).

Though RANSAC algorithm inside the SfM and MVS pipeline largely removes pixels of the dynamic objects to ensure the accuracy of overall depth values, the dynamic pixels cannot be fully eliminated and the contours of objects are not clear as well. Therefore, we employ MaskRCNN [4] with pretrained models from Detectron2 on <https://github.com/facebookresearch/detectron2>. We adopt the pretrained model with config-



Table 2: Some Important Hyperparameters for COLMAP

| Process                  | Hyperparameter               | Value |
|--------------------------|------------------------------|-------|
| Sequential SIFT Matching | min_inlier_ratio             | 0.65  |
|                          | max_distance                 | 0.55  |
|                          | min_num_inliers              | 50    |
|                          | overlap_num                  | 15    |
| RANSAC                   | dyn_num_trials_multiplier    | 3.0   |
|                          | confidence                   | 0.99  |
|                          | min_inlier_ratio             | 0.1   |
| Sparse Reconstucion      | abs_pose_min_inlier_ratio    | 0.25  |
|                          | filter_max_reproj_error      | 4.0   |
|                          | filter_min_tri_angle         | 1.5   |
| Dense Reconstucion       | geom_consistency_max_cost    | 3.0   |
|                          | geom_consistency_regularizer | 0.3   |

Table 3: Some Typical Noises and HSV Thresholds

| Noise Source and Type                           | minimal threshold<br>(H, S, V) | maximal threshold<br>(H, S, V) |
|-------------------------------------------------|--------------------------------|--------------------------------|
| Blue Sky                                        | (172, 5%, 40%)                 | (240, 90%, 100%)               |
| White Cloud and Bright Reflections from Windows | (0, 0%, 100%)                  | (360, 100%, 100%)              |
| Dark and Black Shadows                          | (0, 0%, 0%)                    | (0, 0%, 0%)                    |
| Dusk Cloud and Refections from Roads and Cars   | (0, 0%, 70%)                   | (90, 20%, 100%)                |
| Dusk Sky                                        | (140, 11%, 40%)                | (160, 50%, 100%)               |

uration file of COCO-InstanceSegmentation/mask\_rcnn\_R50\_FPN\_3x.yaml and modify the  
MODEL.ROI\_HEADS.SCORE\_THRESH\_TEST to be 0.5 to find the instance segmentation with the  
class of car, person and bus. To process the image directly, we modify the visualization part in the  
official colab notebook, omitting boxes, keypoints and labels and letting  $\alpha = 1$  in draw\_polygon  
function to set the pixels of the target objects to be black. But semantic or instance segmentation  
cannot distinguish dynamic objects that need to be removed, we use human annotation to check  
whether segmented vehicles or pedestrians are moving or not, relabeling the missing dynamic objects  
and correcting the mislabeled objects. The depth map samples after all the post-processing can be  
found in Fig. 1-(e).

## 1.2 Statistics and Analysis of Depth Map for Each Environment

Here we give the statistical analysis of the proposed *SeasonDepth* dataset for each environment. Since  
all the depth values are scale-free and not absolute for distance, it is not applicable to directly find the  
pixel value distribution for the dataset as [5, 6] do. However, the depth values of sequential frames in  
similar urban scenes under the same environment are similarly distributed, *i.e.* the depth of images  
along the similar streets and blocks are consistent. Then the key point is to align the distribution of  
each environment to the mean of all environments, obtaining the normalized whole distribution map  
and dismissing the scale discrepancy.

Therefore, we first find the original depth value distribution  $p_{D_i}(x)$  for all the slices under each  
environment  $i$ . Then lower quartile  $Q_1$  (25%), median  $Q_2$  (50%) and upper quartile  $Q_3$  (75%) are  
calculated for the original distribution of every environment and the mean value of quartiles can be  
found as reference quartiles  $Q_{1_{ref}}, Q_{2_{ref}}, Q_{3_{ref}}$  for all  $n$  environments,

$$Q_{1_{ref}} = \frac{1}{n} \sum_{i=1}^n Q_{1_i}, Q_{2_{ref}} = \frac{1}{n} \sum_{i=1}^n Q_{2_i}, Q_{3_{ref}} = \frac{1}{n} \sum_{i=1}^n Q_{3_i}$$

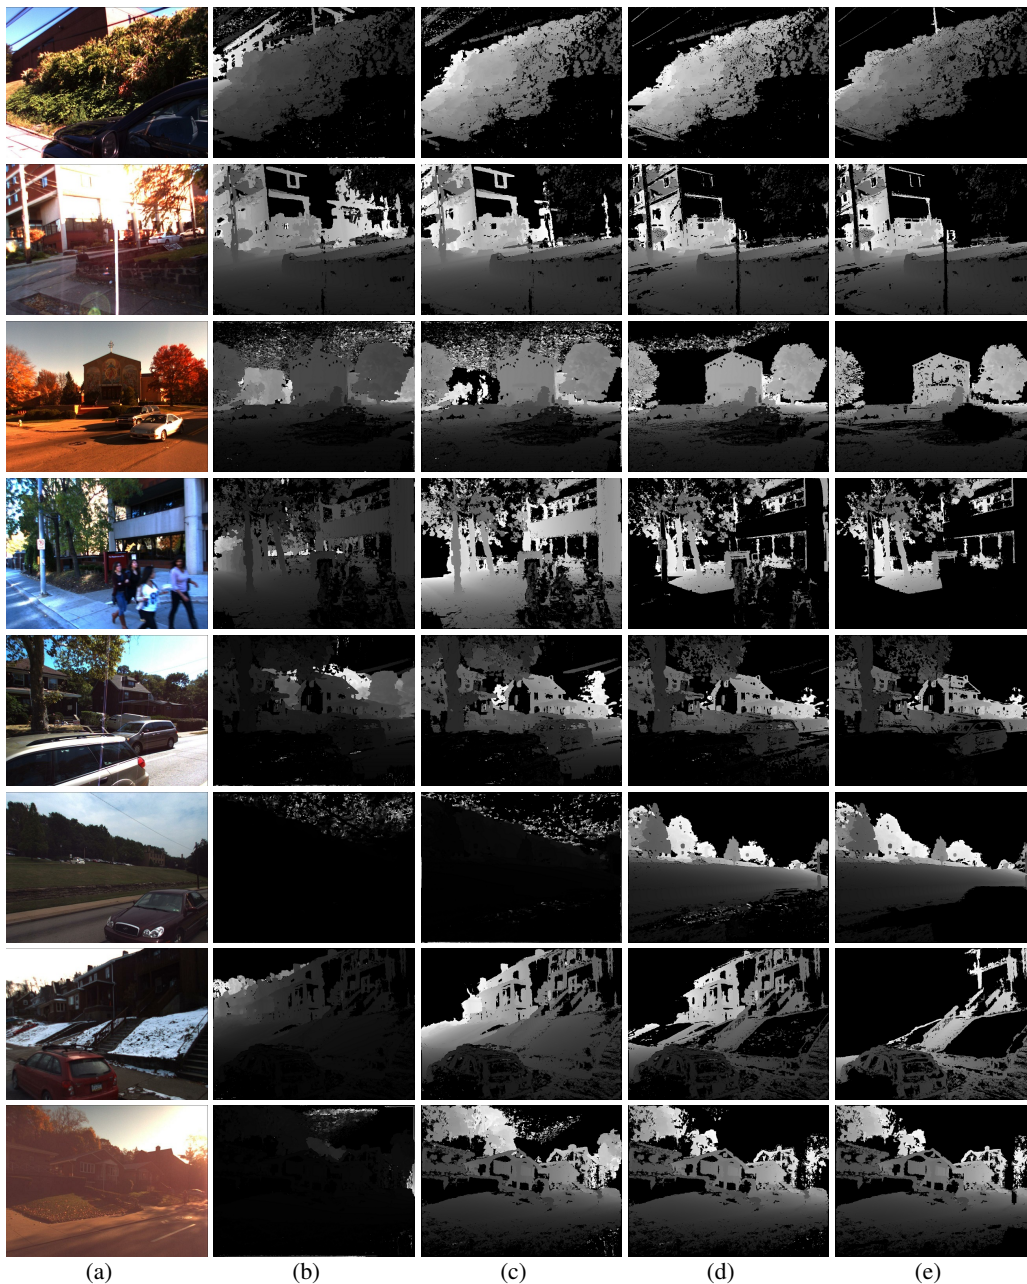

Figure 1: The processing samples given RGB image followed by normalized depth maps for clear visualization of (a) dense reconstruction, (b) range filtering, (c) HSV-based refinement and (d) manual post-processing.

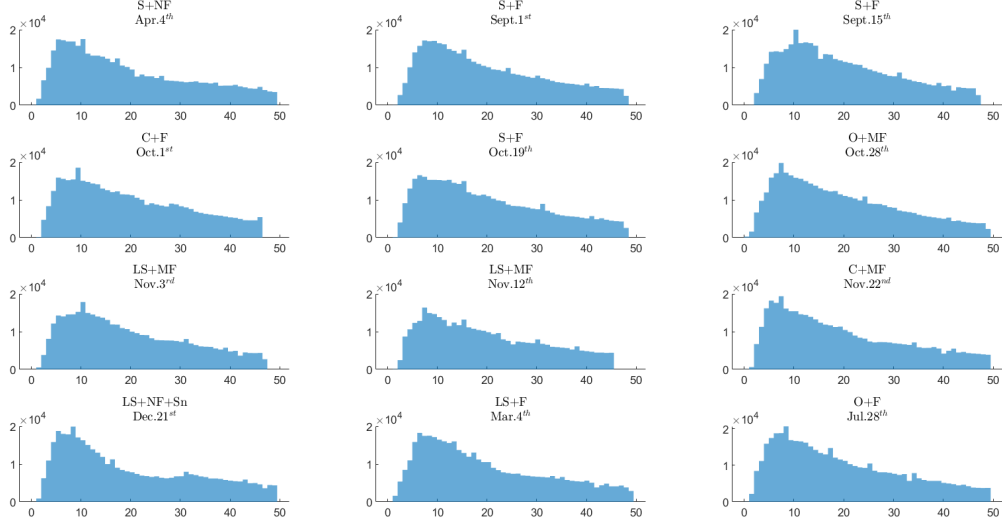

Figure 2: The normalized depth map distribution under all environments. The values of y-axes are number of pixels with the value of abscissa on each image on average.

To find the scale normalization ratio  $r_i$ , we use arithmetic mean to measure the ratio of reference  
quartiles  $Q_{1_{ref}}, Q_{2_{ref}}, Q_{3_{ref}}$  and other quartiles  $Q_{1_i}, Q_{2_i}, Q_{3_i}$ ,

$$r_i = \frac{1}{3} \left( \frac{Q_{1_{ref}}}{Q_{1_i}} + \frac{Q_{2_{ref}}}{Q_{2_i}} + \frac{Q_{3_{ref}}}{Q_{3_i}} \right) \quad (1)$$

Then the distribution  $p_{D_i}(x)$  can be normalized to mean reference environment to obtain  
 $p_{D_{norm_i}}(x)$ ,

$$p_{D_{norm_i}}(x) = r_i p_{D_i}(x) \quad (2)$$

After that, the normalized distribution of all the environments can be added directly to get the whole  
distribution. The distribution map of each environment can be found in Fig. 2. It can be seen  
that all the pixels follow similar long-tail distribution and the average y-axis numbers of per-image  
pixels overcome the bias caused by unbalanced image quantities across different environments. The  
normalization makes each distribution aligned on the x-axis, which can be directly added to obtain  
the total distribution map as Fig.3 in the main body paper shows.

## 2 SeasonDepth Benchmark

### 2.1 Details about Evaluated Models

For the fairness to evaluate the performance of off-the-shelf depth prediction algorithms under  
changing environments, we investigate a large amount of depth prediction methods and choose to  
benchmark the representative and recent state-of-the-art supervised, self-supervised and domain  
adaptation models from well-known *KITTI* leaderboard [7], which are with open-source codes and  
pretrained models for fair comparison. Here give important details for all the evaluated baselines.  
Our experiments are conducted on two NVIDIA 2080Ti cards with 64G RAM on Ubuntu 18.04  
system. The evaluation metrics are modified based on development kit [7] on [http://www.  
cvlibs.net/datasets/kitti/eval\\_depth.php?benchmark=depth\\_prediction](http://www.cvlibs.net/datasets/kitti/eval_depth.php?benchmark=depth_prediction).

For the supervised methods, we evaluate four representative methods, Eigen *et al.* [8], *BTS*  
[9], *MegaDepth* [10] VNL [11]. Eigen *et al.* propose the first CNNs-based depth prediction  
method and introduce the famous Eigen split of *KITTI* dataset for depth prediction benchmark.  
We hence evaluate this representative method through [https://github.com/DhruvJawalkar/  
Depth-Map-Prediction-from-a-Single-Image-using-a-Multi-Scale-Deep-Network](https://github.com/DhruvJawalkar/Depth-Map-Prediction-from-a-Single-Image-using-a-Multi-Scale-Deep-Network)  
with the improved image gradient component in the newer loss to see the performance  
across multiple environments. Recent supervised work *BTS* ranks 4th on *KITTI* benchmark

and we test it on <https://github.com/cogaplex-bts/bts> using the pretrained model DenseNet161 on Eigen split. We further fine-tune this pretrained model of *BTS* on our training set of *slice6* using default configuration file for more 65 epochs to get the best performance of *Average* metric. Note that focal value does not influence the experimental results due to the relative scale of the depth metrics. We test *MegaDepth* method according to <https://www.cs.cornell.edu/projects/megadepth/> with the MegaDepth pretrained models as described in the paper and all the hyperparameters are set as default. *VNL* are evaluated using [https://github.com/YvanYin/VNL\\_Monocular\\_Depth\\_Prediction](https://github.com/YvanYin/VNL_Monocular_Depth_Prediction) with the pretrained model of ResNext101\_32x4d backbone and trained on *KITTI* dataset.

For self-supervised methods, we further categorize them and choose baselines respectively, *i.e.* *Monodepth* [12], *adareg* [13] and *monoResMatch* [14] for stereo geometry based methods, *SfmLearner* [15], *Monodepth2* [16] and *PackNet* [5] for monocular video SfM based methods, and *CC* [17] and *SGDepth* [18] for multi-task learning with monocular SfM unsupervised pipeline.

For stereo geometry based unsupervised methods, *Monodepth* method is evaluated using <https://github.com/OniroAI/MonoDepth-PyTorch>, which is able to reproduce similar results to those in the paper on Eigen split. We test the model of *adareg* from <https://github.com/alexklwong/adareg-monodispnet> pretrained with Eigen split. *monoResMatch* is tested through <https://github.com/fabiotosi92/monoResMatch-Tensorflow> with *KITTI* pretrained model with default hyperparameters.

For sequence SfM based unsupervised methods, we adopt <https://github.com/ClementPinard/SfmLearner-Pytorch> to benchmark *SfmLearner* for better performance than original repo with slight modification. We further fine-tune this pretrained model of *SfmLearner* on our training set of *slice6* using default configuration file for more 35 epochs to get the best performance of *Average* metric. We use the model of ResNet18 pretrained on *ImageNet* and fine-tuned on *KITTI* with the resolution of  $640 \times 192$  to test *PackNet* on <https://github.com/TRI-ML/packnet-sfm>. Similarly, in order to incorporate stereo geometric constraint into the monocular SfM framework, we use the model of mono+stereo pretrained on *ImageNet* and *KITTI* with the resolution of  $640 \times 192$  to evaluate the performance of *Monodepth2* on <https://github.com/nianticlabs/monodepth2>. For the multi-task SfM unsupervised learning methods, *CC* is evaluated with *DispNet*, *PoseNet*, *MaskNet* and *FlowNet* pretrained model on *KITTI* through <https://github.com/anuragranj/cc>. We also test another recent work *SGDepth* on <https://github.com/ifnspaml/SGDepth> with the full model of semantic segmentation and depth prediction with the resolution of  $640 \times 192$ .

Since synthetic datasets like *V-KITTI* include multiple environments in spite of existing domain gap, we additionally evaluate the performance of three domain adaptation methods from *KITTI* benchmark, *Atapour et al.* [19], *T2Net* [20] and *GASDA* [21]. We follow the instruction on <https://github.com/atapour/monocularDepth-Inference> to evaluate the method proposed by *Atapour et al.* with the model pretrained on *KITTI* and *DeepGTAV* [22]. *T2Net* is tested on <https://github.com/lyndonzheng/Synthetic2Realistic> with the weakly-supervised pretrained model for outdoor scenes of *KITTI* and *V-KITTI*. We then evaluate the performance of *GASDA* on <https://github.com/sshan-zhao/GASDA> with the model pretrained on *V-KITTI* and *KITTI* using self-supervised stereo geometric information.

## 2.2 Qualitative Evaluation Results across Environments

In this section, the results of all the evaluated baselines are visualized after adjustment under typical challenging environments, including dark illumination, snowy scene and complex vegetation. See Fig. 3 for more details. From the results of supervised methods, it can be seen that the patterns of predicted depth maps are similar especially for *BTS* [9] and *VNL* [11], where the top and bottom areas are dark while the middle areas are bright due to overfitting, see buildings as examples. But *VNL* [11] shows advantage on depth details (*e.g.* telephone poles and vegetation) in the middle areas which accounts for the best average performance.

Stereo training involved self-supervised methods (including *Monodepth2* [16] and *GASDA* [21]) perform best continuous depth results for the same entity under all environments, *e.g.* depth values of buildings. Monocular video based self-supervised methods do better in distinguishing relative depth from far and near areas, *e.g.* depth values for objects along different directions of roads, especially for multi-task learning ones *CC* [17] and *SGDepth* [18]. Besides, domain adaptation methods still suffer

from domain gaps, which shows that synthetic multi-environment image help little to the performance under the real-world changing environments.

## References

- [1] Torsten Sattler, Will Maddern, Carl Toft, Akihiko Torii, Lars Hammarstrand, Erik Stenborg, Daniel Safari, Masatoshi Okutomi, Marc Pollefeys, Josef Sivic, et al. Benchmarking 6dof outdoor visual localization in changing conditions. In *Proceedings of the IEEE Conference on Computer Vision and Pattern Recognition*, pages 8601–8610, 2018.
- [2] Johannes L Schonberger and Jan-Michael Frahm. Structure-from-motion revisited. In *Proceedings of the IEEE Conference on Computer Vision and Pattern Recognition*, pages 4104–4113, 2016.
- [3] Johannes L Schönberger, Enliang Zheng, Jan-Michael Frahm, and Marc Pollefeys. Pixelwise view selection for unstructured multi-view stereo. In *European Conference on Computer Vision*, pages 501–518. Springer, 2016.
- [4] Kaiming He, Georgia Gkioxari, Piotr Dollár, and Ross Girshick. Mask r-cnn. In *Proceedings of the IEEE international conference on computer vision*, pages 2961–2969, 2017.
- [5] Vitor Guizilini, Rares Ambrus, Sudeep Pillai, Allan Raventos, and Adrien Gaidon. 3d packing for self-supervised monocular depth estimation. In *Proceedings of the IEEE/CVF Conference on Computer Vision and Pattern Recognition*, pages 2485–2494, 2020.
- [6] Igor Vasiljevic, Nick Kolkin, Shanyi Zhang, Ruotian Luo, Haochen Wang, Falcon Z Dai, Andrea F Daniele, Mohammadreza Mostajabi, Steven Basart, Matthew R Walter, et al. Diode: A dense indoor and outdoor depth dataset. *arXiv preprint arXiv:1908.00463*, 2019.
- [7] Jonas Uhrig, Nick Schneider, Lukas Schneider, Uwe Franke, Thomas Brox, and Andreas Geiger. Sparsity invariant cnns. In *International Conference on 3D Vision (3DV)*, 2017.
- [8] David Eigen, Christian Puhrsch, and Rob Fergus. Depth map prediction from a single image using a multi-scale deep network. In *Advances in neural information processing systems*, pages 2366–2374, 2014.
- [9] Jin Han Lee, Myung-Kyu Han, Dong Wook Ko, and Il Hong Suh. From big to small: Multi-scale local planar guidance for monocular depth estimation. *arXiv preprint arXiv:1907.10326*, 2019.
- [10] Zhengqi Li and Noah Snavely. Megadepth: Learning single-view depth prediction from internet photos. In *Proceedings of the IEEE Conference on Computer Vision and Pattern Recognition*, pages 2041–2050, 2018.
- [11] Wei Yin, Yifan Liu, Chunhua Shen, and Youliang Yan. Enforcing geometric constraints of virtual normal for depth prediction. In *Proceedings of the IEEE International Conference on Computer Vision*, pages 5684–5693, 2019.
- [12] Clément Godard, Oisín Mac Aodha, and Gabriel J Brostow. Unsupervised monocular depth estimation with left-right consistency. In *Proceedings of the IEEE Conference on Computer Vision and Pattern Recognition*, pages 270–279, 2017.
- [13] Alex Wong and Stefano Soatto. Bilateral cyclic constraint and adaptive regularization for unsupervised monocular depth prediction. In *Proceedings of the IEEE Conference on Computer Vision and Pattern Recognition*, pages 5644–5653, 2019.
- [14] Fabio Tosi, Filippo Aleotti, Matteo Poggi, and Stefano Mattoccia. Learning monocular depth estimation infusing traditional stereo knowledge. In *Proceedings of the IEEE Conference on Computer Vision and Pattern Recognition*, pages 9799–9809, 2019.
- [15] Tinghui Zhou, Matthew Brown, Noah Snavely, and David G Lowe. Unsupervised learning of depth and ego-motion from video. In *Proceedings of the IEEE Conference on Computer Vision and Pattern Recognition*, pages 1851–1858, 2017.
- [16] Clément Godard, Oisín Mac Aodha, Michael Firman, and Gabriel J Brostow. Digging into self-supervised monocular depth estimation. In *Proceedings of the IEEE International Conference on Computer Vision*, pages 3828–3838, 2019.
- [17] Anurag Ranjan, Varun Jampani, Lukas Balles, Kihwan Kim, Deqing Sun, Jonas Wulff, and Michael J Black. Competitive collaboration: Joint unsupervised learning of depth, camera motion, optical flow and motion segmentation. In *Proceedings of the IEEE/CVF Conference on Computer Vision and Pattern Recognition*, pages 12240–12249, 2019.
- [18] Marvin Klingner, Jan-Aike Termöhlen, Jonas Mikolajczyk, and Tim Fingscheidt. Self-supervised monocular depth estimation: Solving the dynamic object problem by semantic guidance. In *European Conference on Computer Vision*, pages 582–600. Springer, 2020.



|                                                           |                   |                       |                   |                  |                   |                    |
|-----------------------------------------------------------|-------------------|-----------------------|-------------------|------------------|-------------------|--------------------|
| <b>RGB Images</b>                                         |                   |                       |                   |                  |                   |                    |
| <b>Groundtruths</b>                                       |                   |                       |                   |                  |                   |                    |
| <b>Eigen <i>et al.</i></b><br>Supervised                  |                   |                       |                   |                  |                   |                    |
| <b>BTS</b><br>Supervised                                  |                   |                       |                   |                  |                   |                    |
| <b>MegaDepth</b><br>Supervised                            |                   |                       |                   |                  |                   |                    |
| <b>VNL</b><br>Supervised                                  |                   |                       |                   |                  |                   |                    |
| <b>Monodepth</b><br>Self-supervised<br>Stereo Training    |                   |                       |                   |                  |                   |                    |
| <b>adareg</b><br>Self-supervised<br>Stereo Training       |                   |                       |                   |                  |                   |                    |
| <b>monoResMatch</b><br>Self-supervised<br>Stereo Training |                   |                       |                   |                  |                   |                    |
| <b>SfMLearner</b><br>Self-supervised<br>Monocular Video   |                   |                       |                   |                  |                   |                    |
| <b>PackNet</b><br>Self-supervised<br>Monocular Video      |                   |                       |                   |                  |                   |                    |
| <b>Monodepth2</b><br>Self-supervised<br>Monocular Video   |                   |                       |                   |                  |                   |                    |
| <b>CC</b><br>Self-supervised<br>Monocular Video           |                   |                       |                   |                  |                   |                    |
| <b>SGDepth</b><br>Self-supervised<br>Monocular Video      |                   |                       |                   |                  |                   |                    |
|                                                           | O+MF<br>Oct. 28th | LS+NF+Sn<br>Dec. 21st | S+F<br>Sept. 15th | S+NF<br>Apr. 4th | LS+MF<br>Nov. 3rd | LS+MF<br>Nov. 12th |

To be continued

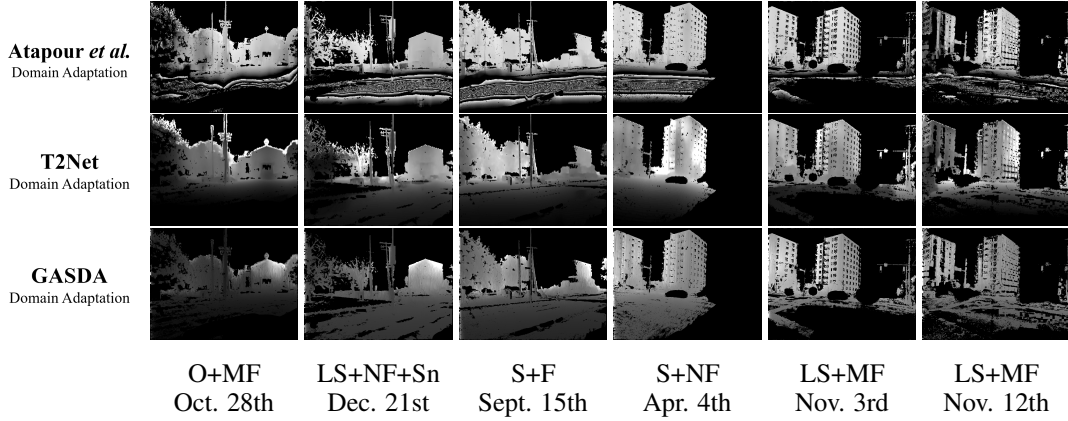

Figure 3: Qualitative results for all the baselines with multiple illumination, vegetation and weather conditions.

- [19] Amir Atapour-Abarghouei and Toby P Breckon. Real-time monocular depth estimation using synthetic data with domain adaptation via image style transfer. In *Proceedings of the IEEE Conference on Computer Vision and Pattern Recognition*, pages 2800–2810, 2018.
- [20] Chuanxia Zheng, Tat-Jen Cham, and Jianfei Cai. T2net: Synthetic-to-realistic translation for solving single-image depth estimation tasks. In *Proceedings of the European Conference on Computer Vision (ECCV)*, pages 767–783, 2018.
- [21] Shanshan Zhao, Huan Fu, Mingming Gong, and Dacheng Tao. Geometry-aware symmetric domain adaptation for monocular depth estimation. In *Proceedings of the IEEE Conference on Computer Vision and Pattern Recognition*, pages 9788–9798, 2019.
- [22] Aitor Ruano Miralles. An open-source development environment for self-driving vehicles. <http://openaccess.uoc.edu/webapps/o2/bitstream/10609/63765/6/aruanomTFM0617memory.pdf>, 2017.
- [23] Hernán Badino, Daniel Huber, and Takeo Kanade. Visual topometric localization. In *2011 IEEE Intelligent Vehicles Symposium (IV)*, pages 794–799. IEEE, 2011.
- [24] Timnit Gebru, Jamie Morgenstern, Briana Vecchione, Jennifer Wortman Vaughan, Hanna Wallach, Hal Daumé III, and Kate Crawford. Datasheets for datasets. *arXiv preprint arXiv:1803.09010*, 2018.
- [25] G. Bradski. The OpenCV Library. *Dr. Dobb’s Journal of Software Tools*, 2000.
- [26] Mans Larsson, Erik Stenborg, Lars Hammarstrand, Marc Pollefeys, Torsten Sattler, and Fredrik Kahl. A cross-season correspondence dataset for robust semantic segmentation. In *Proceedings of the IEEE Conference on Computer Vision and Pattern Recognition*, pages 9532–9542, 2019.

## A Appendix

### A.1 Discussion on Societal Impacts

To our best knowledge, we are the first work focusing on the influence of changing environments on monocular depth prediction task, which has great significance to the long-term or lifelong autonomous driving and outdoor mobile robotics. The robustness of depth prediction algorithm is important to the safety of vehicles and pedestrians from the long-run perspective.

However, there are also some potential negative societal impacts. First, our dataset is not that general because the original dataset CMU Visual Localization dataset is only collected in one city, which may mislead the algorithm to overfit on the similar scenes, leading to unstability and risks when used in the complex scenes for applications. Second, privacy is another problem. Although the dataset is secondarily derived and there are many licenses on it, malicious and unintended uses may still happen, *e.g.* collect the human faces or properties of the locals, which may violate the privacy right and cause other problems.

Dismissing such concerns needs the efforts from communities of research, industry and other social organization. Researchers and engineers should fully evaluate the performance and robustness

of algorithms with environmental changes despite using our dataset, to make sure the safety of autonomous driving. Social organization should also keep an eye on the use of such open-source real-world dataset to avoid the illegal use.

## A.2 Information about SeasonDepth Dataset and Benchmark Toolkit

Our dataset and benchmark can be accessed through <https://seasondepth.github.io/> and the toolkit for evaluation is available on <https://github.com/SeasonDepth/SeasonDepth>. The dataset is placed in long-term preserved figshare. The persistent identifier of Digital Object Identifier is 10.6084/m9.figshare.14731323, which can be accessed on <https://doi.org/10.6084/m9.figshare.14731323> or [https://figshare.com/articles/dataset/SeasonDepth\\_Cross-Season\\_Monocular\\_Depth\\_Prediction\\_Dataset/14731323](https://figshare.com/articles/dataset/SeasonDepth_Cross-Season_Monocular_Depth_Prediction_Dataset/14731323). The dataset has also adhered to Schema.org and DCAT metadata standards on <https://seasondepth.github.io/> through the tool on <https://www.google.com/webmasters/markup-helper/u/0/>. Due to the fact that SeasonDepth is repackaged from existing dataset, according to the original license, the license of our dataset is BY-NC-SA-4.0 <https://creativecommons.org/licenses/by-nc-sa/4.0/> considering the official announcement to use the latest version <https://creativecommons.org/faq/#why-should-i-use-the-latest-version-of-the-creative-commons-licenses>. Since the metrics are based on *KITTI* benchmark [7], the toolkit and benchmark are under BY-NC-SA-4.0 license <https://creativecommons.org/licenses/by-nc-sa/4.0/> according to <http://www.cvlibs.net/datasets/kitti/> and the official announcement to use the latest version <https://creativecommons.org/faq/#why-should-i-use-the-latest-version-of-the-creative-commons-licenses>.

## A.3 Licenses of All Used Assets

The license of original CMU Visual Localization Dataset [23] and CMU-Seasons Dataset [1] have the license of BY-NC-SA 3.0. The license of *KITTI* benchmark is BY-NC-SA 3.0. Codes and pretrained models of Eigen *et al.*, *BTS*, *MegaDepth*, *VNL*, *Monodepth*, *adareg*, *monoResMatch*, *SfMLearner*, *PackNet*, *Monodepth2*, *CC*, *SGDepth*, *Atapour et al.*, *T2Net* and *GASDA* are under the licenses of MIT, GPL 3.0, MIT, 2-clause BSD, UCLB ACP-A, MIT, MIT, MIT, MIT, *Monodepth2* license on <https://github.com/nianticlabs/monodepth2/blob/master/LICENSE>, MIT, MIT, MIT, MIT and MIT.

The copyright and terms of service from <https://www.visuallocalization.net/> can be found on <https://www.visuallocalization.net/privacypolicy/> and the license is Creative Commons Attribution-NonCommercial-ShareAlike 3.0 License, see <https://creativecommons.org/licenses/by-nc-sa/3.0/>.

## A.4 Dataset Documentation and Intended Uses

We adopt datasheet for dataset [24] template from <https://www.overleaf.com/latex/templates/datasheet-for-dataset-template/jgqyyzyprxth>, keeping the original format of the documentation in blue color but with single column for clarity. We authors state that we will bear all responsibility in case of violation of rights and data is under the license of BY-NC-SA 4.0. We host our dataset and benchmark through GitHub and GitHub Pages with license and dedicated people are responsible for the long-term maintenance.

|                                          |
|------------------------------------------|
| <b>Datasheet for SeasonDepth Dataset</b> |
| <b>Motivation</b>                        |

**For what purpose was the dataset created?** Was there a specific task in mind? Was there a specific gap that needed to be filled? Please provide a description.

The dataset is created for the purpose of monocular depth prediction under changing environments, which is really essential to robust outdoor long-term visual perception and localization for autonomous driving and mobile robots but has not been studied yet to our best knowledge.



292 **Who created this dataset (e.g., which team, research group) and on behalf of which entity (e.g., company, institution,**  
293 **organization)?**

294 The dataset is created by Hanjiang Hu, Baoquan Yang, Zhijian Qiao, Ding Zhao and Hesheng Wang, where  
295 Hanjiang Hu, Baoquan Yang, Zhijian Qiao and Hesheng Wang are with Intelligent Robotics and Machine Vision  
296 Lab, Department of Automation, Shanghai Jiao Tong University. Hanjiang Hu and Ding Zhao are with Safe AI  
297 Lab at Carnegie Mellon University.

298 **Who funded the creation of the dataset? If there is an associated grant, please provide the name of the grantor and the grant**  
299 **name and number.**

300 This work was supported in part by the Natural Science Foundation of China under Grant 62073222 and  
301 U1913204, in part by grants from NVIDIA Corporation.

302 **Any other comments?** No.

## 303 **Composition**

304  
305 **What do the instances that comprise the dataset represent (e.g., documents, photos, people, countries)? Are there**  
306 **multiple types of instances (e.g., movies, users, and ratings; people and interactions between them; nodes and edges)? Please**  
307 **provide a description.**

308 SeasonDepth is derived from CMU Visual Localization dataset through structure from motion and the instances  
309 include RGB images together with corresponding depth maps as groundtruths, saved in jpg and png files  
310 respectively. Besides, some documents are also involved, including README.md and intrinsic parameters file.

311 **How many instances are there in total (of each type, if appropriate)?**

312 We totally provide 17725 pairs of RGB image and depth map over 12 different environments for 7 slices from  
313 left and right cameras. See detailed numbers of instances in Tab. 1.

314 **Does the dataset contain all possible instances or is it a sample (not necessarily random) of instances from a larger set?**  
315 **If the dataset is a sample, then what is the larger set? Is the sample representative of the larger set (e.g., geographic coverage)? If**  
316 **so, please describe how this representativeness was validated/verified. If it is not representative of the larger set, please describe**  
317 **why not (e.g., to cover a more diverse range of instances, because instances were withheld or unavailable).**

318 The dataset contains RGB images and depth maps with 7 different left-right urban road sequences along  
319 a route of 8.5km in Pittsburgh under 12 different environmental conditions. It is a sample of instances from  
320 the larger set which contains RGB images and depth maps of all the outdoor urban road views with all the  
321 camera perspectives under all the possible environments from all over the world. It is not fully representative for  
322 the whole larger dataset since rainy or night scenes are not involved due to the lack of the original dataset and  
323 unavailable. But it covers commonly-seen environments for current outdoor visual perception so we believe it  
324 can be representative for the study of depth prediction under changing environments.

325 **What data does each instance consist of? "Raw" data (e.g., unprocessed text or images) or features? In either case,**  
326 **please provide a description.**

327 Each instance consists of one undistorted RGB image saved in jpg format.

328 **Is there a label or target associated with each instance? If so, please provide a description.**

329 The label is the normalized depth map saved in uint16 png format obtained from SfM for each RGB image  
330 instance.

331 **Is any information missing from individual instances? If so, please provide a description, explaining why this information**  
332 **is missing (e.g., because it was unavailable). This does not include intentionally removed information, but might include, e.g.,**  
333 **redacted text.**

334 The information of distortion from original image is missing due to undistortion using intrinsics parameters of  
335 the cameras. But we think what we have done is meaningful and the distortion of original image is not what we  
336 want and even can bring about noise and error.

337 **Are relationships between individual instances made explicit (e.g., users' movie ratings, social network links)?** If so,  
338 please describe how these relationships are made explicit.

339 Yes, the relationships between individual instances are made explicit. We provide the timestamp for each image  
340 instance which contains information of sequential index, camera index and environmental information so that  
341 every two instances can be compared due to the relationship.

342 **Are there recommended data splits (e.g., training, development/validation, testing)?** If so, please provide a description of  
343 these splits, explaining the rationale behind them.

344 We adopt the categorized slices of Urban part according to [1] with rectification through camera intrinsic file.  
345 Specifically, we use slice2, slice3, slice7, slice8 as the split test slices for evaluation and benchmark, and the  
346 other slices slice4, slice5, slice6 are intended to treat as training set. The reason lies in that the dataset is priority  
347 to benchmark the performance of existing depth prediction methods, so the number of test set is large. For the  
348 sake of fine-tuning through small subset of multi-environment images in the future, we also provide the training  
349 set in a limited quantity.

350 **Are there any errors, sources of noise, or redundancies in the dataset?** If so, please provide a description.

351 We have filtered most of the noise using RANSAC algorithm, range filtering, HSV refinement and segmentation-  
352 based manual post-processing. Although errors and noise are inevitable, we try our best to avoid the influence  
353 from them.

354 **Is the dataset self-contained, or does it link to or otherwise rely on external resources (e.g., websites, tweets, other  
355 datasets)?** If it links to or relies on external resources, a) are there guarantees that they will exist, and remain constant, over time;  
356 b) are there official archival versions of the complete dataset (i.e., including the external resources as they existed at the time the  
357 dataset was created); c) are there any restrictions (e.g., licenses, fees) associated with any of the external resources that might  
358 apply to a future user? Please provide descriptions of all external resources and any restrictions associated with them, as well as  
359 links or other access points, as appropriate.

360 Our dataset is built based on CMU Visual Localization dataset [23] and CMU-Seasons dataset [1].  
361 a) Guarantees and maintenance can be found in their papers. b) Our SeasonDepth dataset has been  
362 archived on [https://figshare.com/articles/dataset/SeasonDepth\\_Cross-Season\\_Monocular\\_  
363 Depth\\_Prediction\\_Dataset/14731323](https://figshare.com/articles/dataset/SeasonDepth_Cross-Season_Monocular_Depth_Prediction_Dataset/14731323) with DOI of 10.6084/m9.figshare.14731323. External re-  
364 sources are archived on <https://www.visuallocalization.net/>. c) The license of original CMU Visual  
365 Localization Dataset [23] and CMU-Seasons Dataset [1] have the license of BY-NC-SA 3.0 with detailed  
366 restrictions on <https://creativecommons.org/licenses/by-nc-sa/3.0/>.

367 **Does the dataset contain data that might be considered confidential (e.g., data that is protected by legal privilege or by  
368 doctor-patient confidentiality, data that includes the content of individuals non-public communications)?** If so, please  
369 provide a description.

370 No.

371 **Does the dataset contain data that, if viewed directly, might be offensive, insulting, threatening, or might otherwise cause  
372 anxiety?** If so, please describe why.

373 No.

374 **Does the dataset relate to people?** If not, you may skip the remaining questions in this section.

375 Yes, many of the images contain people.

376 **Does the dataset identify any subpopulations (e.g., by age, gender)?** If so, please describe how these subpopulations are  
377 identified and provide a description of their respective distributions within the dataset.

378 No, although we adopt instance segmentation for pedestrians, we do not identify the subpopulations and tell how  
379 old or what gender they are. What we are only interested in is whether they are moving or not, i.e. dynamic  
380 objects.

381 **Is it possible to identify individuals (i.e., one or more natural persons), either directly or indirectly (i.e., in combination  
382 with other data) from the dataset?** If so, please describe how.

383 No, it is not possible to identify individuals from our dataset without any semantic information but only  
384 human body identification is possible. For those pedestrians that are static (*e.g.* waiting for traffic light), the  
385 corresponding depth values are kept and can be used to get the person body through clustering algorithm of  
386 depth values.

387 **Does the dataset contain data that might be considered sensitive in any way (e.g., data that reveals racial or ethnic**  
388 **origins, sexual orientations, religious beliefs, political opinions or union memberships, or locations; financial or health**  
389 **data; biometric or genetic data; forms of government identification, such as social security numbers; criminal history)?**  
390 **If so, please provide a description.**

391 Yes, the dataset contains some information about the cars, people and locations in Pittsburgh. But the detailed  
392 locations are not available in our dataset but may be found in the original datasets [23, 1] with GPS or map  
393 information.

394 **Any other comments?** No

## 395 **Collection Process**

397 **How was the data associated with each instance acquired?** Was the data directly observable (e.g., raw text, movie ratings),  
398 reported by subjects (e.g., survey responses), or indirectly inferred/derived from other data (e.g., part-of-speech tags, model-  
399 based guesses for age or language)? If data was reported by subjects or indirectly inferred/derived from other data, was the data  
400 validated/verified? If so, please describe how.

401 The data associated with each instance is actually the depth map and the RGB image. Depth maps are  
402 obtained by SfM, and we filtered its noise using RANSAC, range filtering, HSV filtering and manual post-  
403 processing. However, we can not verify it because the outdoor RGB images from the originally collected  
404 dataset [23] do not have accurate depth values. But RGB image data was validated and released on <https://www.visuallocalization.net/> by [1].  
405

406 **What mechanisms or procedures were used to collect the data (e.g., hardware apparatus or sensor, manual human**  
407 **curation, software program, software API)?** How were these mechanisms or procedures validated?

408 We use off-the-shelf algorithms and softwares like COLMAP [2, 3], OpenCV [25], PowerToys from <https://github.com/microsoft/PowerToys> and Painting App on Windows 10. These procedures are all commonly-  
409 used and validated by previous works like [1, 26].  
410

411 **If the dataset is a sample from a larger set, what was the sampling strategy (e.g., deterministic, probabilistic with specific**  
412 **sampling probabilities)?**

413 Since we use slice2, slice3, slice7, slice8 as the split test slices for evaluation and benchmark, and the other  
414 slices slice4, slice5, slice6 are intended to treat as training set as our dataset, we sample the data deterministically  
415 from larger set given specific sequences and environments.

416 **Who was involved in the data collection process (e.g., students, crowdworkers, contractors) and how were they compen-**  
417 **sated (e.g., how much were crowdworkers paid)?**

418 For RGB images, we direct use CMU Visual Localization dataset after undistortion. For depth maps, we hired  
419 several undergraduate students for manual post-processing and double check and they were compensated by  
420 their honored projects and scores.

421 **Over what timeframe was the data collected? Does this timeframe match the creation timeframe of the data associated**  
422 **with the instances (e.g., recent crawl of old news articles)?** If not, please describe the timeframe in which the data associated  
423 with the instances was created.

424 The original data was collected in 2010-2011 and the detailed date can be found in Tab. 1. The timeframe does  
425 not match the creation timeframe of the data associated with the instances, *i.e.* the creation of depth map and the  
426 undistorted RGB images. The timeframe of the depth map is from 2019 to 2021, with many rounds to polish the  
427 quality of the dataset.

428 **Were any ethical review processes conducted (e.g., by an institutional review board)?** If so, please provide a description of  
429 these review processes, including the outcomes, as well as a link or other access point to any supporting documentation.

430 No, at least the derived dataset not. But the original datasets [23, 1] may be reviewed by such ethical review  
431 board.

432 **Does the dataset relate to people?** If not, you may skip the remaining questions in this section.

433 Yes, some images contain people.

434 **Did you collect the data from the individuals in question directly, or obtain it via third parties or other sources (e.g.,  
435 websites)?**

436 We use the data from original datasets [23, 1], where the images were collected through a car with two cameras  
437 in Pittsburgh under different environments.

438 **Were the individuals in question notified about the data collection?** If so, please describe (or show with screenshots or other  
439 information) how notice was provided, and provide a link or other access point to, or otherwise reproduce, the exact language of  
440 the notification itself.

441 We have no idea whether people were notified when the original dataset was collected in 2010-2011, but we  
442 believe so and please refer to [23] for more details.

443 **Did the individuals in question consent to the collection and use of their data?** If so, please describe (or show with  
444 screenshots or other information) how consent was requested and provided, and provide a link or other access point to, or  
445 otherwise reproduce, the exact language to which the individuals consented.

446 We have no idea whether people consent to the collection and use of data when the original dataset was collected  
447 in 2010-2011, but we believe so and please refer to [23] for more details.

448 **If consent was obtained, were the consenting individuals provided with a mechanism to revoke their consent in the future  
449 or for certain uses?** If so, please provide a description, as well as a link or other access point to the mechanism (if appropriate).

450 We have no idea whether people were provided a mechanism to revoke their consent when the original dataset  
451 was collected in 2010-2011, but we believe so and please refer to [23] for more details.

452 **Has an analysis of the potential impact of the dataset and its use on data subjects (e.g., a data protection impact analysis)  
453 been conducted?** If so, please provide a description of this analysis, including the outcomes, as well as a link or other access  
454 point to any supporting documentation.

455 Yes, the potential impact of the dataset has been analyzed and it can be found in Appendix A.1. To our best  
456 knowledge, we are the first work focusing on the influence of changing environments on depth prediction tasks,  
457 which has great significance to the long-term or lifelong autonomous driving and outdoor mobile robotics. The  
458 robustness of depth prediction algorithm is important to the safety of vehicles and pedestrians from long-run  
459 perspective. However, there are also some potential negative societal impacts. First, our dataset is not that  
460 general because the original dataset CMU Visual Localization dataset is only collected to one city, which may  
461 mislead the algorithm to overfit on the single scene, leading to unstable when used in the real complex scenes for  
462 applications and causing danger then. Second, privacy is another problem. Although the dataset is secondarily  
463 derived and there are many licenses on it, malicious and unintended uses may still happen, e.g. collect the human  
464 faces or properties of the locals, which may violate the privacy right and cause other problems. Dismissing  
465 such concerns need the communities from research, industry and other social organization. Researcher and  
466 engineers should clearly evaluate the performance of the robustness across environmental changes despite using  
467 our dataset, to make sure the safety of autonomous driving. Social organization should also keep an eye on the  
468 use of such open-source real-world dataset to avoid the illegal use.

469 **Any other comments?**

470 No.

## 471 Preprocessing/cleaning/labeling

473 **Was any preprocessing/cleaning/labeling of the data done (e.g., discretization or bucketing, tokenization, part-of-speech  
474 tagging, SIFT feature extraction, removal of instances, processing of missing values)?** If so, please provide a description.  
475 If not, you may skip the remainder of the questions in this section.

476 Yes, we use COLMAP for SfM and dense depth reconstruction, followed by range filtering, HSV refinement and  
477 manual post-processing to label the dataset. More details can be found in Sec. 1.1.

478 **Was the "raw" data saved in addition to the preprocessed/cleaned/labeled data (e.g., to support unanticipated future  
479 uses)?** If so, please provide a link or other access point to the "raw" data.

480 Yes, the "raw" data is from original datasets [23, 1] which can be download through [https://www.  
481 visuallocalization.net/datasets/..](https://www.visuallocalization.net/datasets/)

482 **Is the software used to preprocess/clean/label the instances available?** If so, please provide a link or other access point.

483 Yes, the softwares we used in the data processing are available, including [https://colmap.github.  
484 io/](https://colmap.github.io/), <https://opencv.org/>, <https://github.com/microsoft/PowerToys> and [https://github.com/  
485 facebookresearch/detectron2](https://github.com/facebookresearch/detectron2).

486 **Any other comments?**

487 No.

## Uses

490 **Has the dataset been used for any tasks already?** If so, please provide a description.

491 Yes, we have conducted extensive evaluation using representative baseline methods together with recent open-  
492 source state-of-the-art pretrained models on *KITTI* leaderboard [7] to benchmark the performance of monocular  
493 depth prediction under changing environments. More details can be found in Sec. 2.1.

494 **Is there a repository that links to any or all papers or systems that use the dataset?** If so, please provide a link or other  
495 access point.

496 Yes, we have listed the evaluated algorithms in Sec. 2.1 with detailed links and model parameters.

497 **What (other) tasks could the dataset be used for?**

498 We can not think of other tasks that the dataset can be used for.

499 **Is there anything about the composition of the dataset or the way it was collected and preprocessed/cleaned/labeled that  
500 might impact future uses?** For example, is there anything that a future user might need to know to avoid uses that could result  
501 in unfair treatment of individuals or groups (e.g., stereotyping, quality of service issues) or other undesirable harms (e.g., financial  
502 harms, legal risks) If so, please provide a description. Is there anything a future user could do to mitigate these undesirable  
503 harms?

504 We have make all the terms of use clear in the REAME.md file in the downloaded zip dataset, users must follow  
505 the instructions in it and the toolkit readme file on <https://github.com/SeasonDepth/SeasonDepth>. The  
506 harms are totally avoidable if users follow the instructions strictly and there is risk of unfair treatment of  
507 individuals or groups.

508 **Are there tasks for which the dataset should not be used?** If so, please provide a description.

509 Although the dataset is secondarily derived and there are many licenses on it, malicious and unintended uses  
510 may still happen, *e.g.* collect the human faces or properties of the locals, which may violate the privacy  
511 right and cause other problems. Dismissing such concerns need the communities from research, industry and  
512 other social organization. Researcher and engineers should clearly evaluate the performance of the robustness  
513 across environmental changes despite using our dataset, to make sure the safety of autonomous driving. Social  
514 organization should also keep an eye on the use of such open-source real-world dataset to avoid the illegal use.

515 **Any other comments?** No.

## Distribution

518 **Will the dataset be distributed to third parties outside of the entity (e.g., company, institution, organization) on behalf of**  
519 **which the dataset was created? If so, please provide a description.**

520 Yes, the dataset is open-source and can be accessed on figshare [https://figshare.com/articles/](https://figshare.com/articles/dataset/SeasonDepth_Cross-Season_Monocular_Depth_Prediction_Dataset/14731323)  
521 [dataset/SeasonDepth\\_Cross-Season\\_Monocular\\_Depth\\_Prediction\\_Dataset/14731323](https://figshare.com/articles/dataset/SeasonDepth_Cross-Season_Monocular_Depth_Prediction_Dataset/14731323). More de-  
522 scriptions can be found on <https://seasondepth.github.io/>.

523 **How will the dataset will be distributed (e.g., tarball on website, API, GitHub) Does the dataset have a digital object identifier**  
524 **(DOI)?**

525 The dataset is distributed on figshare [https://figshare.com/articles/dataset/SeasonDepth\\_](https://figshare.com/articles/dataset/SeasonDepth_Cross-Season_Monocular_Depth_Prediction_Dataset/14731323)  
526 [Cross-Season\\_Monocular\\_Depth\\_Prediction\\_Dataset/14731323](https://figshare.com/articles/dataset/SeasonDepth_Cross-Season_Monocular_Depth_Prediction_Dataset/14731323) and the toolkit for the benchmark  
527 can be found on <https://github.com/SeasonDepth/SeasonDepth>. The DOI of the dataset is  
528 10.6084/m9.figshare.14731323 which can be accessed through [https://doi.org/10.6084/m9.](https://doi.org/10.6084/m9.figshare.14731323)  
529 [figshare.14731323](https://doi.org/10.6084/m9.figshare.14731323).

530 **When will the dataset be distributed?**

531 Now our dataset is available on <https://doi.org/10.6084/m9.figshare.14731323>.

532 **Will the dataset be distributed under a copyright or other intellectual property (IP) license, and/or under applicable terms**  
533 **of use (ToU)? If so, please describe this license and/or ToU, and provide a link or other access point to, or otherwise reproduce,**  
534 **any relevant licensing terms or ToU, as well as any fees associated with these restrictions.**

535 Due to SeasonDepth is repackaged from existing dataset, according to the original license, the license of  
536 our dataset is BY-NC-SA-4.0 <https://creativecommons.org/licenses/by-nc-sa/4.0/> considering  
537 the official announcement to use the latest version <https://creativecommons.org/faq/>. Since the metrics  
538 are based on *KITTI* benchmark [7], the toolkit and the benchmark is under BY-NC-SA-4.0 license [https://](https://creativecommons.org/licenses/by-nc-sa/4.0/)  
539 [creativecommons.org/licenses/by-nc-sa/4.0/](https://creativecommons.org/licenses/by-nc-sa/4.0/) according to [http://www.cvlibs.net/datasets/](http://www.cvlibs.net/datasets/kitti/)  
540 [kitti/](http://www.cvlibs.net/datasets/kitti/) and the official announcement to use the latest version on <https://creativecommons.org/faq/>.

541 **Have any third parties imposed IP-based or other restrictions on the data associated with the instances? If so, please**  
542 **describe these restrictions, and provide a link or other access point to, or otherwise reproduce, any relevant licensing terms, as**  
543 **well as any fees associated with these restrictions.**

544 No.

545 **Do any export controls or other regulatory restrictions apply to the dataset or to individual instances? If so, please**  
546 **describe these restrictions, and provide a link or other access point to, or otherwise reproduce, any supporting documentation.**

547 No.

548 **Any other comments?**

549 No.

## 550 Maintenance

552 **Who will be supporting/hosting/maintaining the dataset?**

553 Hanjiang Hu and Baoquan Yang will mainly maintain the dataset and other members from Intelligent Robotics  
554 and Machine Vision Lab, Department of Automation, Shanghai Jiao Tong University may also be involved in  
555 the future for support if necessary.

556 **How can the owner/curator/manager of the dataset be contacted (e.g., email address)?**

557 Email address: [seasondepth@outlook.com](mailto:seasondepth@outlook.com). Main maintainer: Hanjiang Hu, Baoquan Yang, Hesheng  
558 Wang.

559 **Is there an erratum? If so, please provide a link or other access point.**

560 New updates outside the work will be released on <https://seasondepth.github.io/>.

561 **Will the dataset be updated (e.g., to correct labeling errors, add new instances, delete instances)?** If so, please describe  
562 how often, by whom, and how updates will be communicated to users (e.g., mailing list, GitHub)?

563 Yes, we will release the training set on <https://seasondepth.github.io/> and toolkit intructions on <https://github.com/SeasonDepth/SeasonDepth> before July by Hanjiang Hu and Baoquan Yang and anyone who  
564 watches our work will be noticed through github email.  
565

566 **If the dataset relates to people, are there applicable limits on the retention of the data associated with the instances (e.g.,**  
567 **were individuals in question told that their data would be retained for a fixed period of time and then deleted)?** If so,  
568 please describe these limits and explain how they will be enforced.

569 For the consideration that we adopt the long-retained dataset from [23, 1], we think we will not set any limits  
570 on retention as long as the original dataset on <https://www.visuallocalization.net/datasets/> is still  
571 available.

572 **Will older versions of the dataset continue to be supported/hosted/maintained?** If so, please describe how. If not, please  
573 describe how its obsolescence will be communicated to users.

574 We will continue support the release version even if we release newer dataset in the future and all the maintenance  
575 can be found on <https://seasondepth.github.io/>.

576 **If others want to extend/augment/build on/contribute to the dataset, is there a mechanism for them to do so?** If so, please  
577 provide a description. Will these contributions be validated/verified? If so, please describe how. If not, why not? Is there a process  
578 for communicating/distributing these contributions to other users? If so, please provide a description.

579 Yes, we welcome all contribution to our work from others. We plan to use collaboration mechanism on GitHub  
580 to do so and their contribution will be shown and validated on our official website <https://seasondepth.github.io/>  
581 and any user can view and cite their contribution.

582 **Any other comments?**

583 No.
